# Supplementary material for: RNA silencing and HIV: A hypothesis for the etiology of the severe combined immunodeficiency induced by the virus
Source: Springer Nature journal article supplement (doi:10.1186/1742-4690-5-79), 2008-01-01
Supplement: Additional file 1 [file 1742-4690-5-79-s1.pdf]

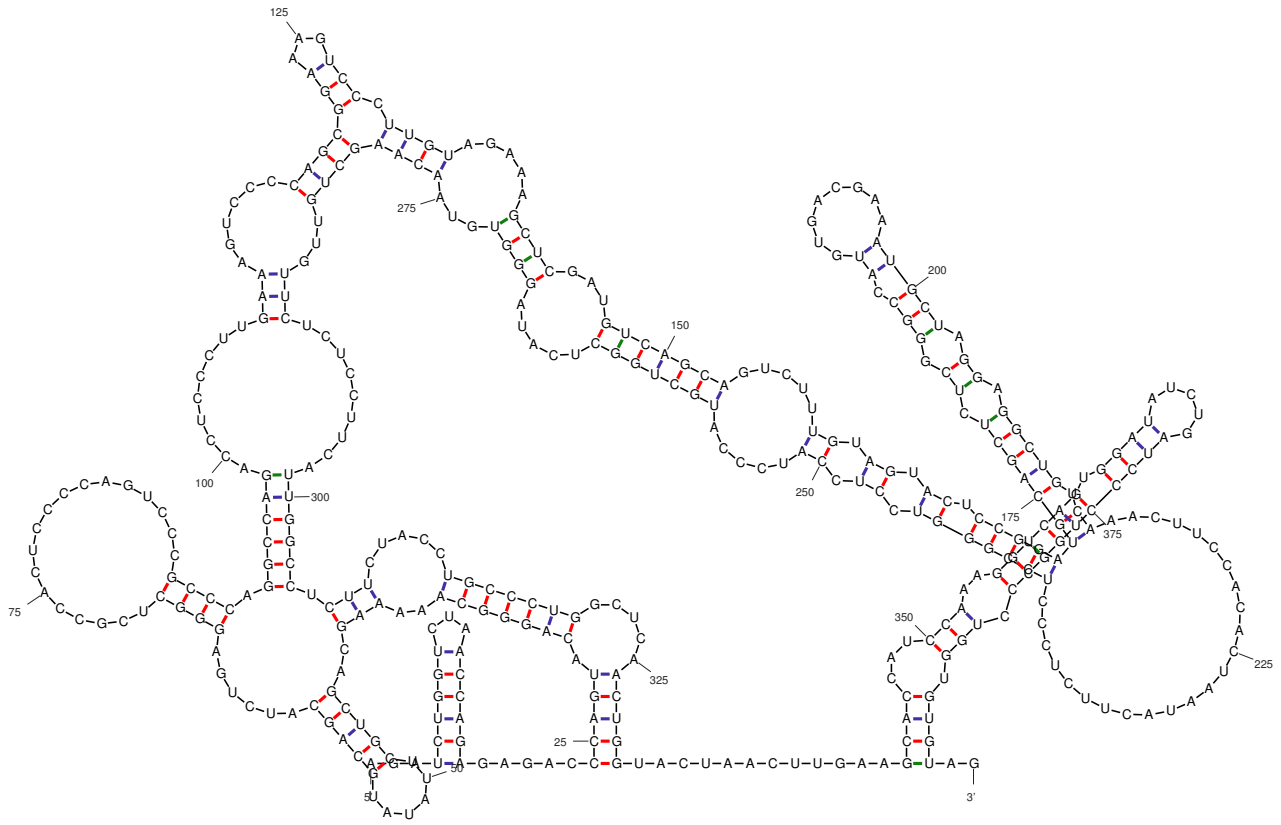

dG = -99.2 HAamiRNA

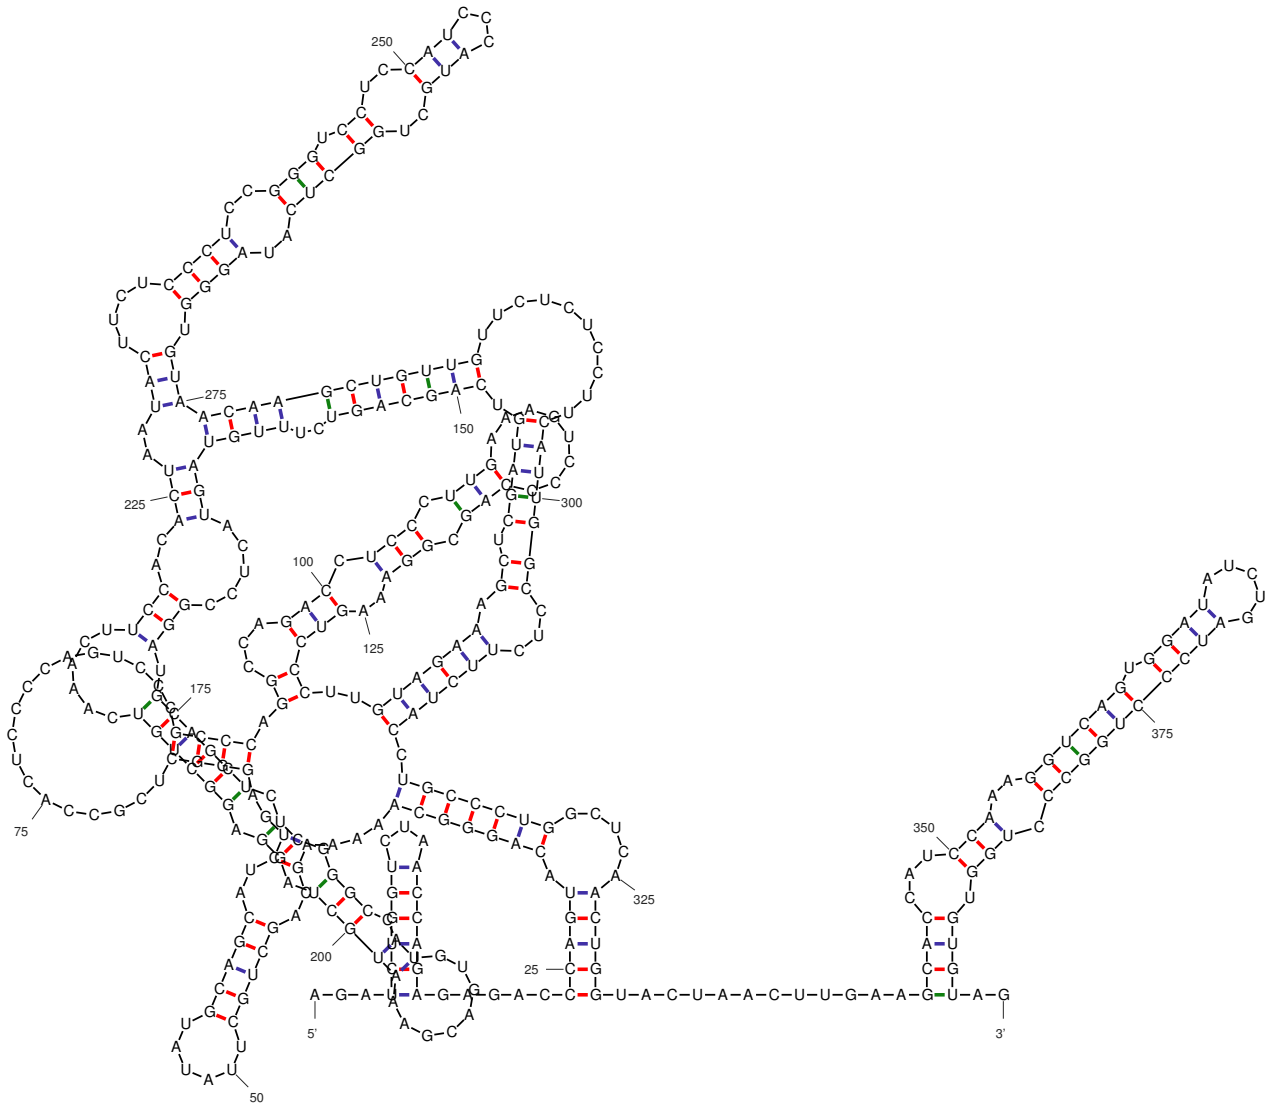

dG = -98.5 HAamiRNA

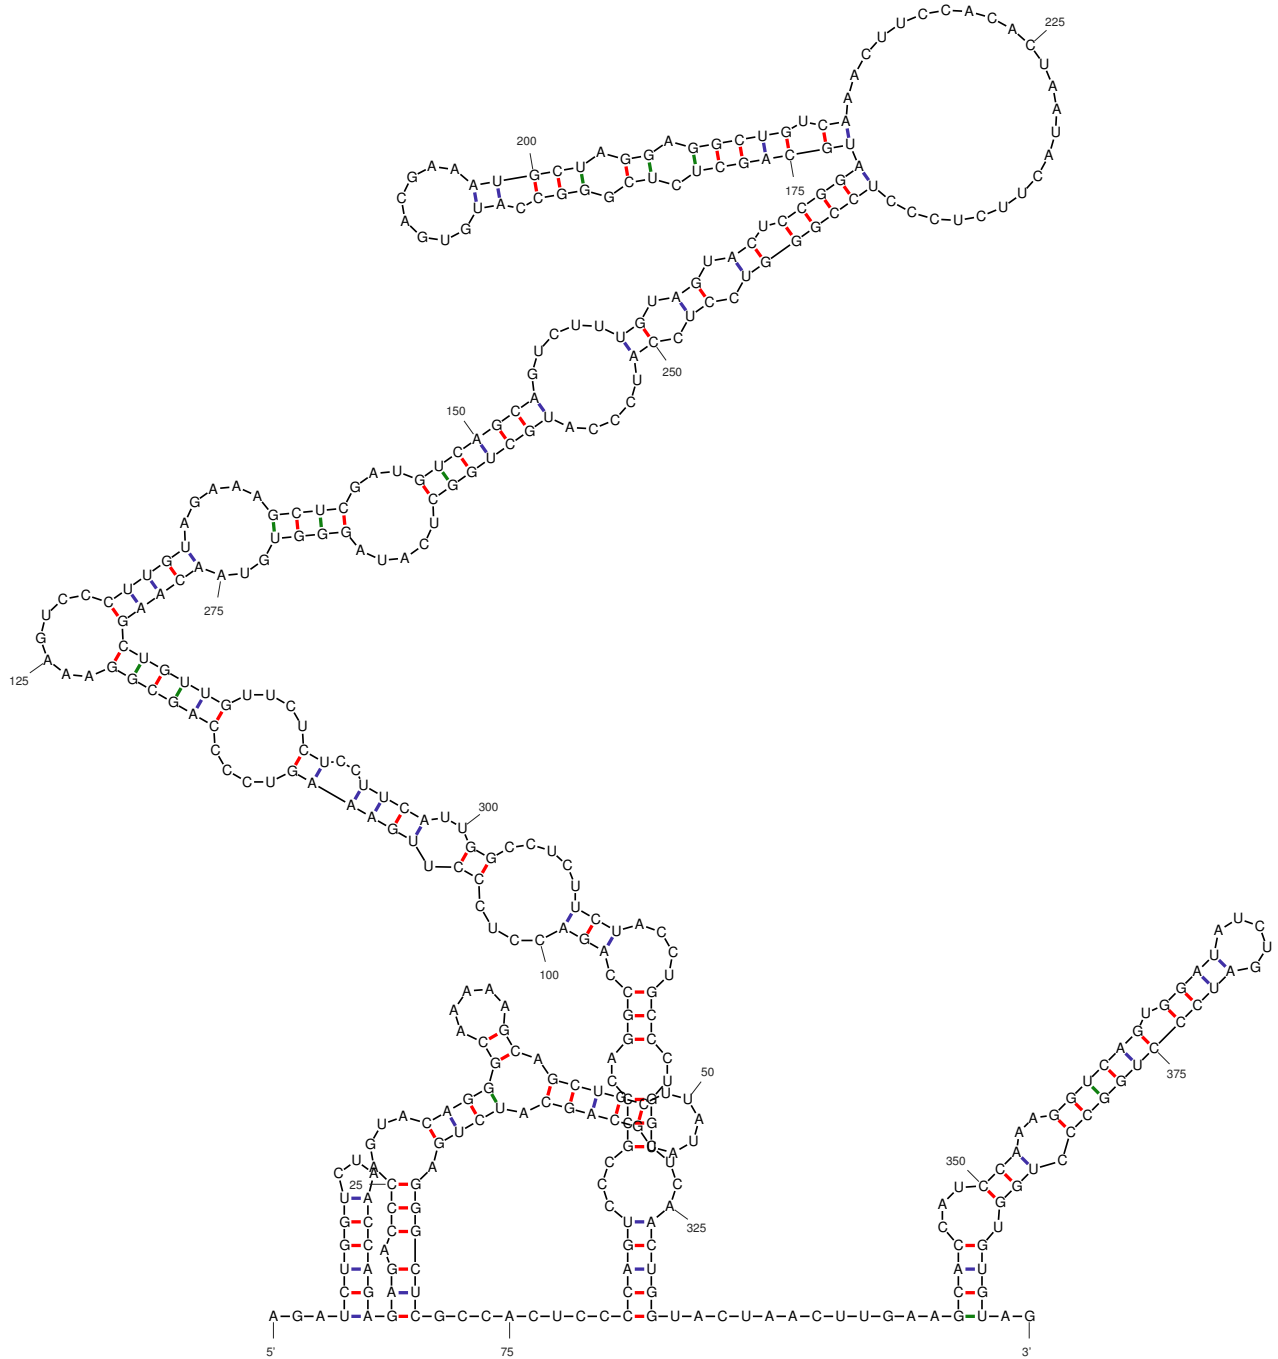

dG = -98.4 HAamiRNA

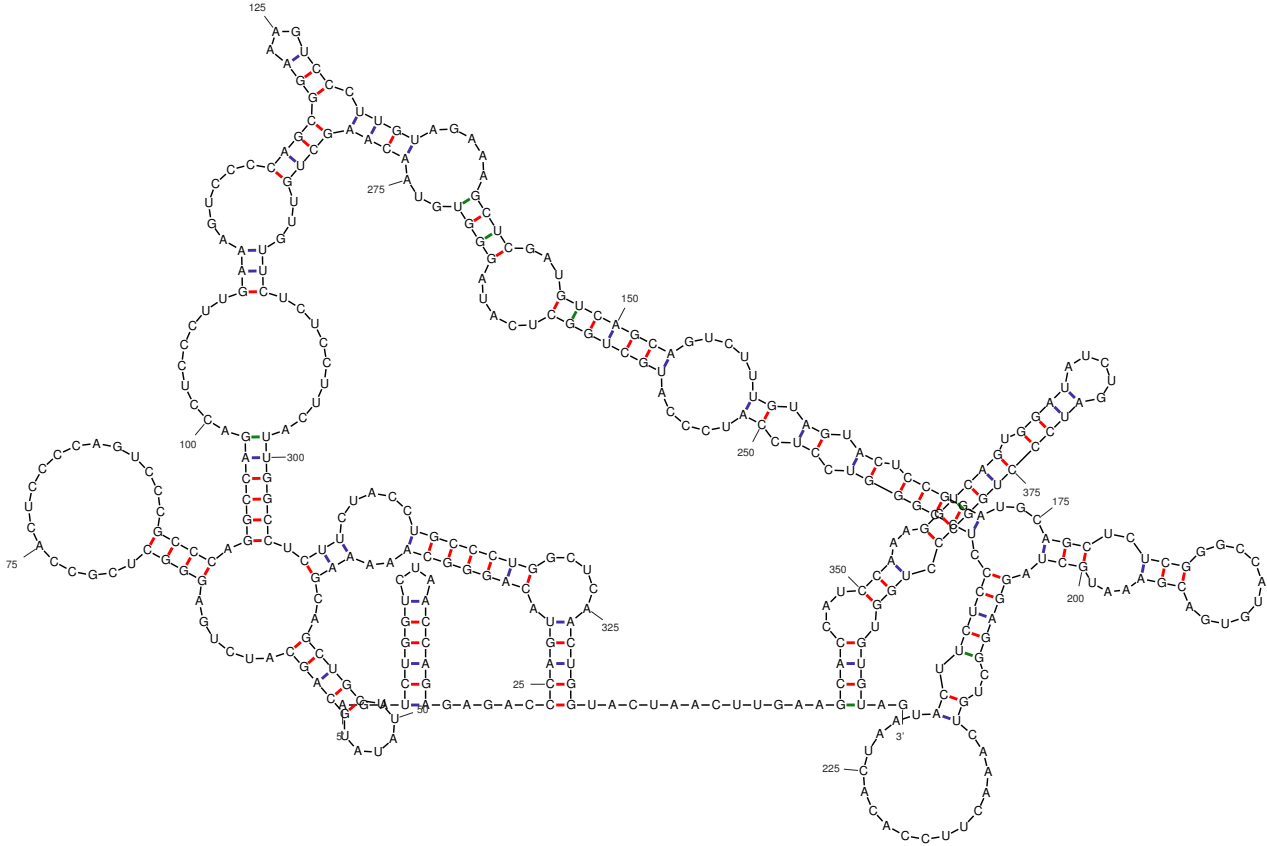

dG = -98.4 HAamiRNA

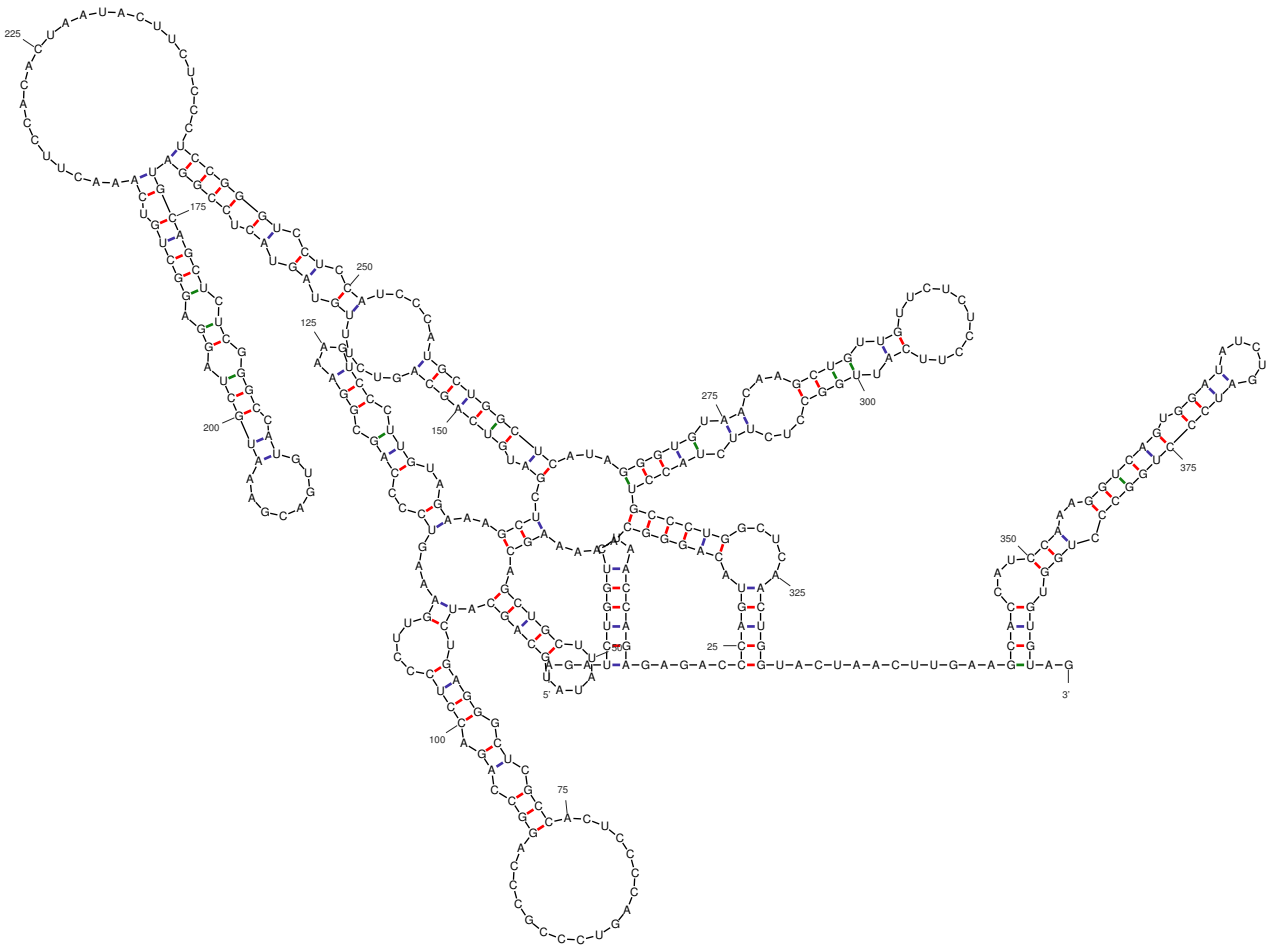

dG = -98.2 HAAmiRNA

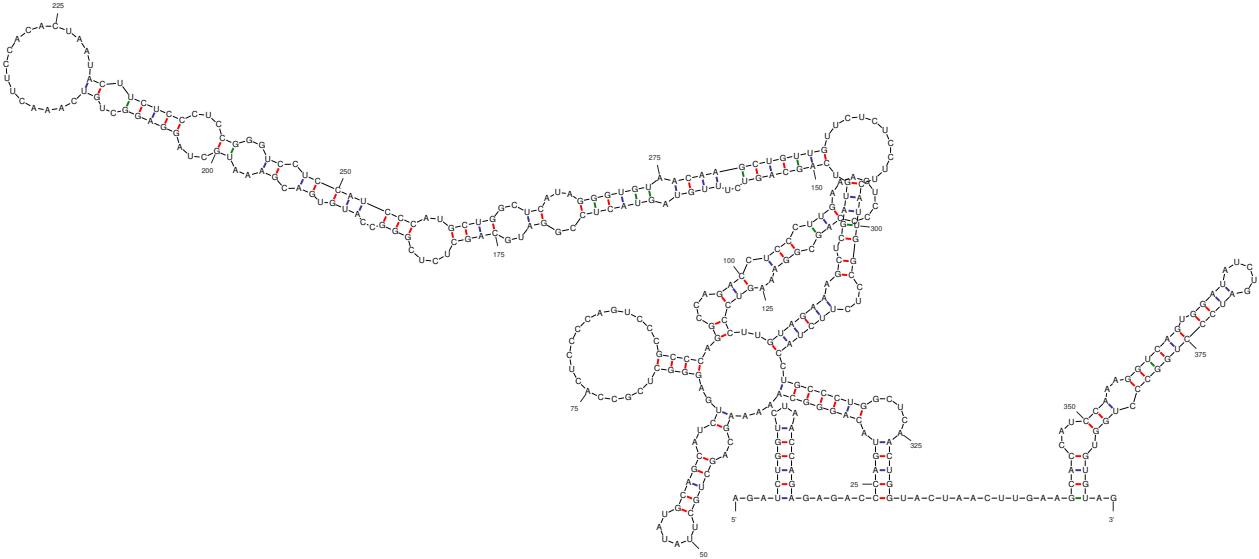

dG = -98.2 HAAmiRNA

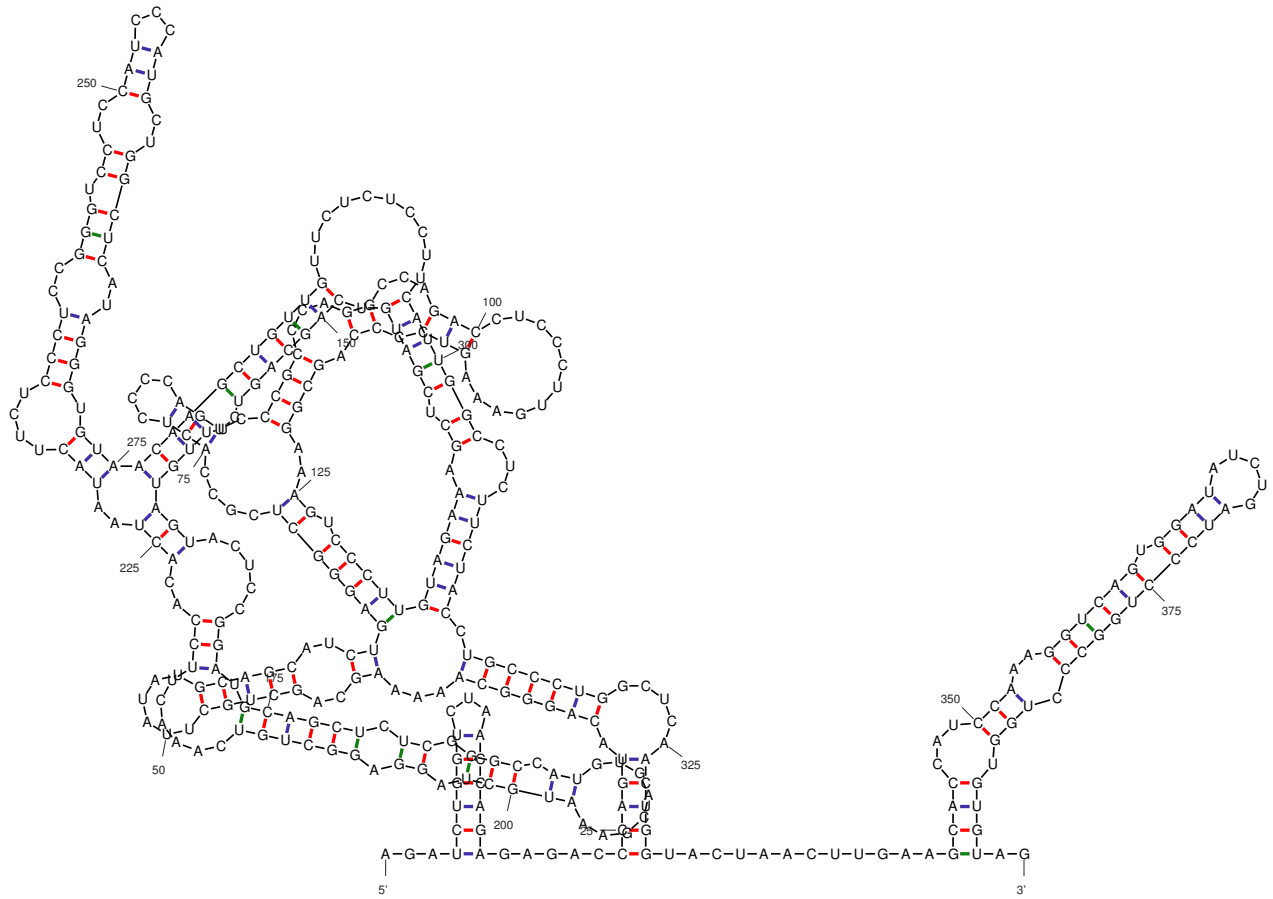

dG = -98.1 HAamiRNA

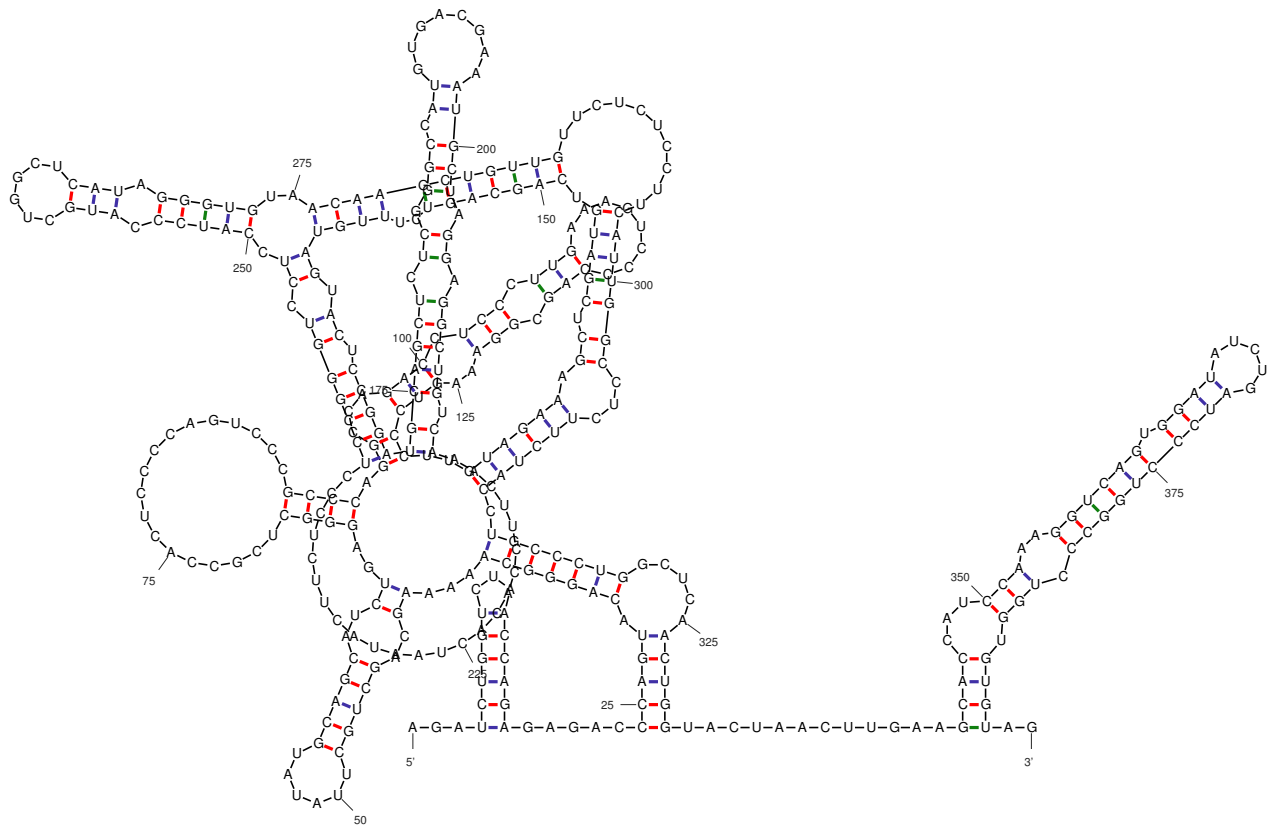

dG = -97.1 HAAmiRNA

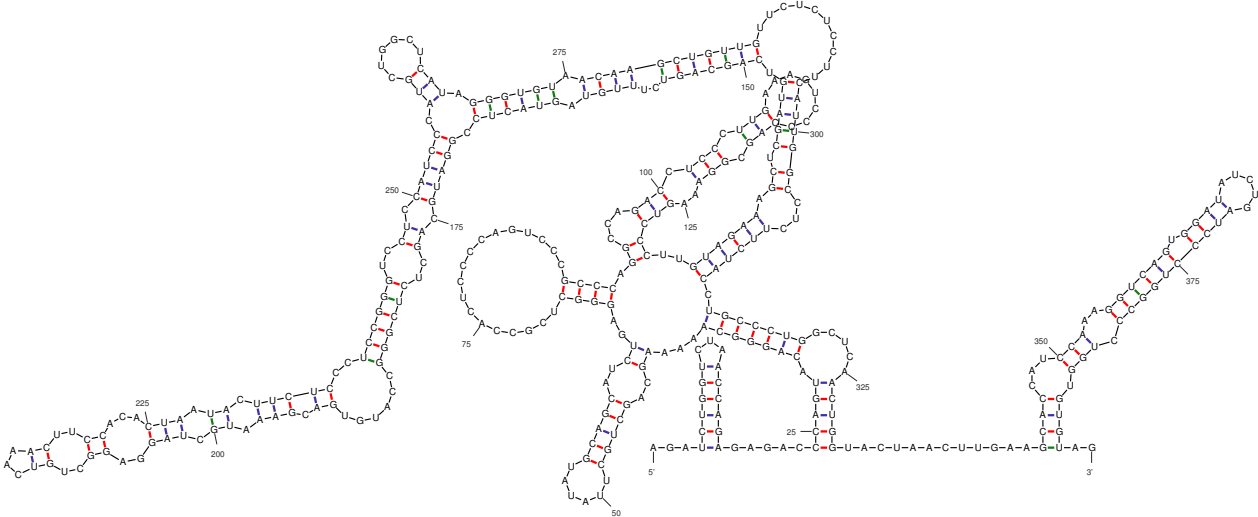

dG = -96.7 HAamiRNA

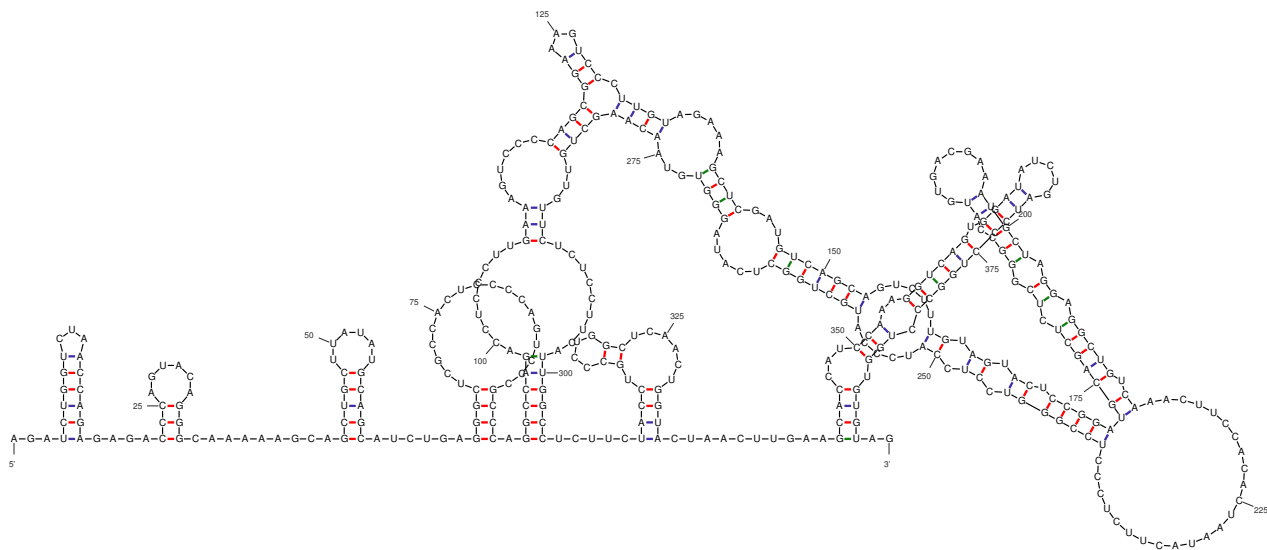

dG = -96.5    HAAMiRNA

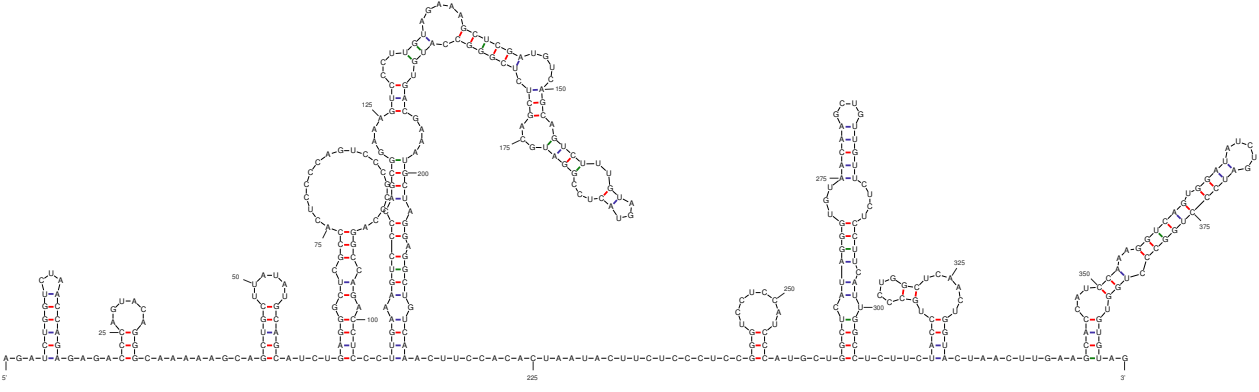

dG = -95.9 HAamiRNA

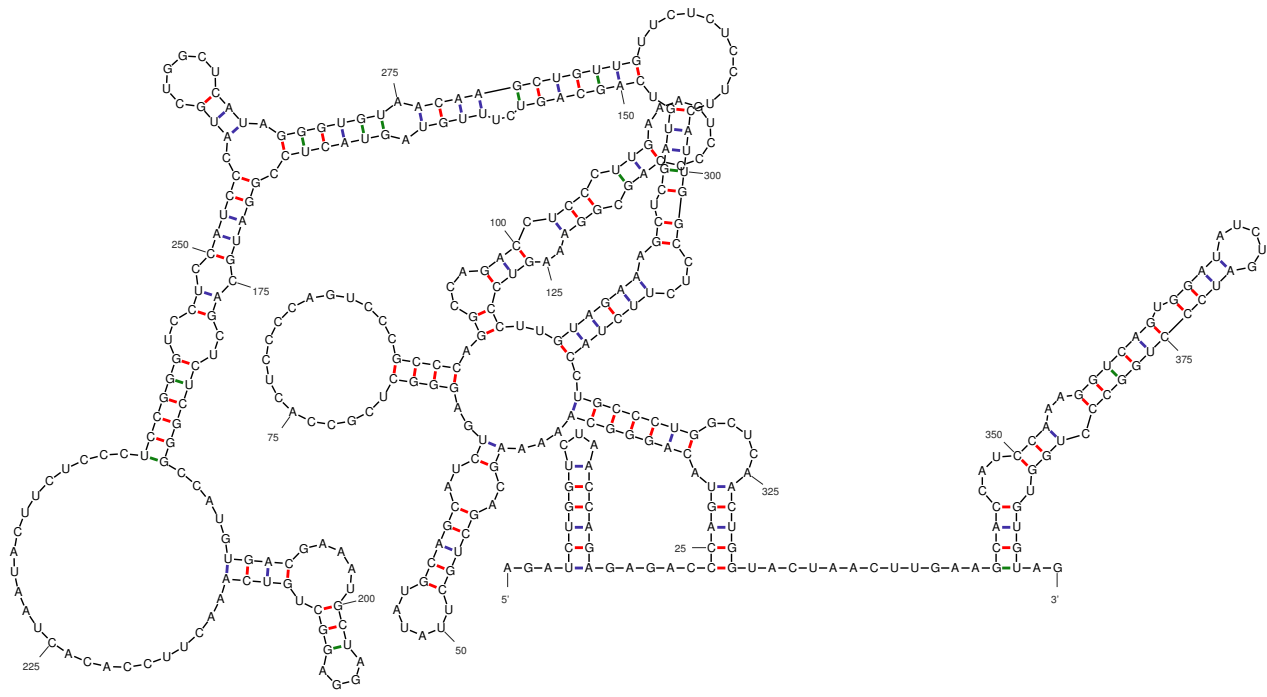

dG = -95.6 HAamiRNA

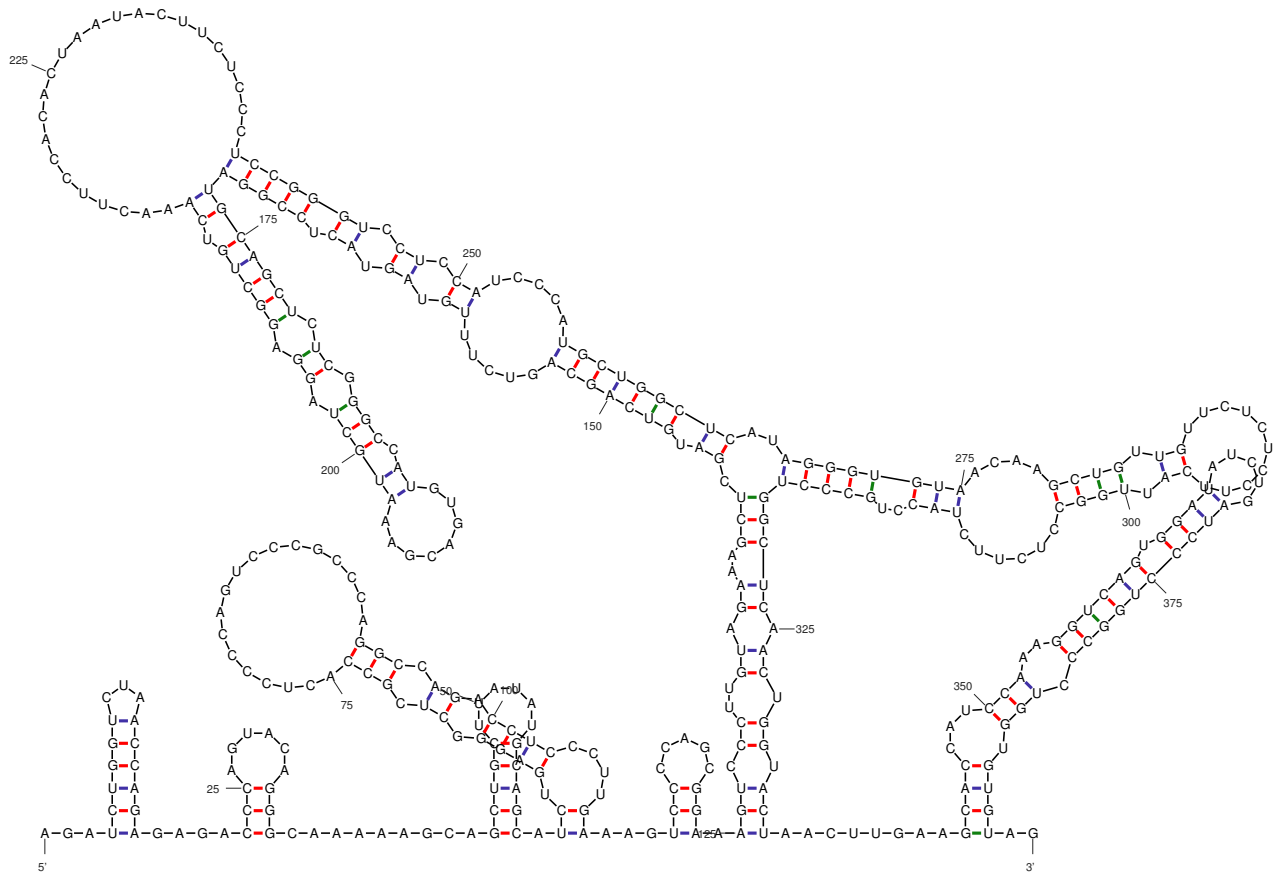

dG = -95.6 HAamiRNA

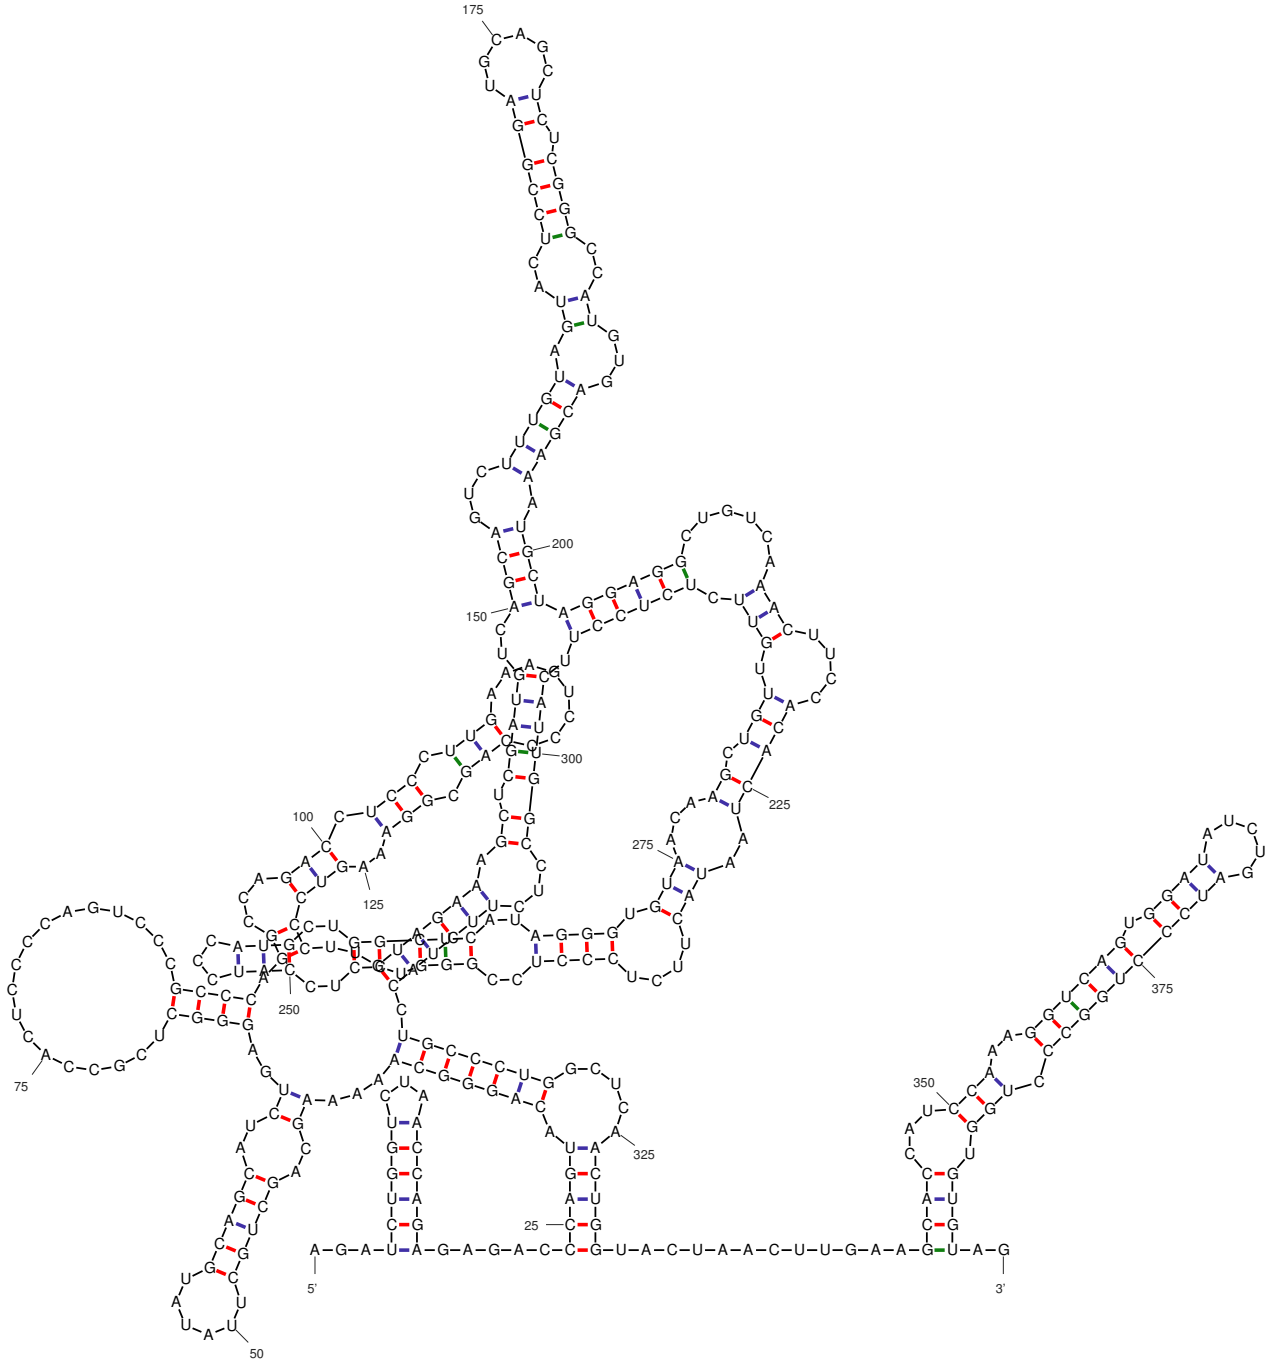

dG = -95.4 HAamiRNA

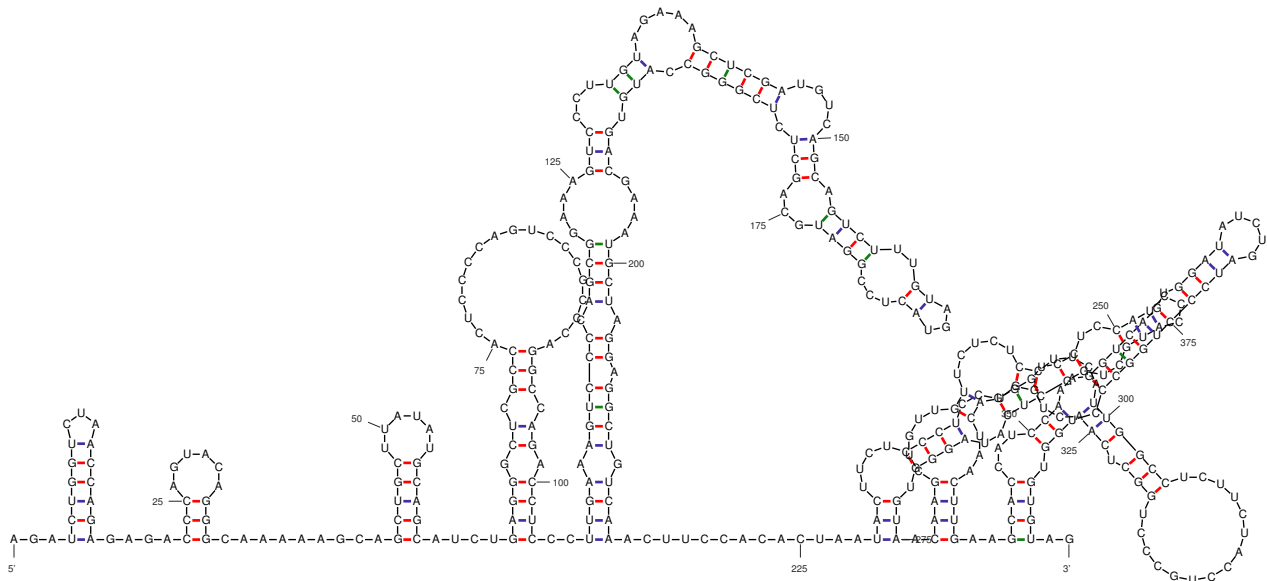

dG = -95.3 HAAmiRNA

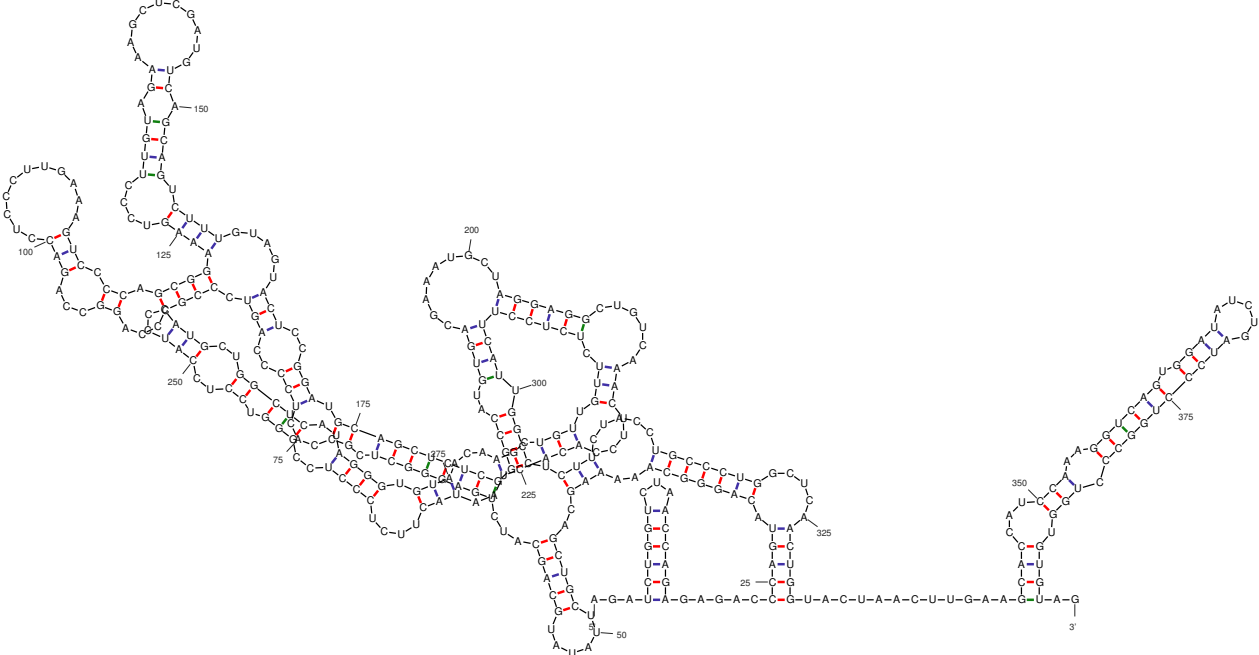

dG = -95.2 HAamiRNA

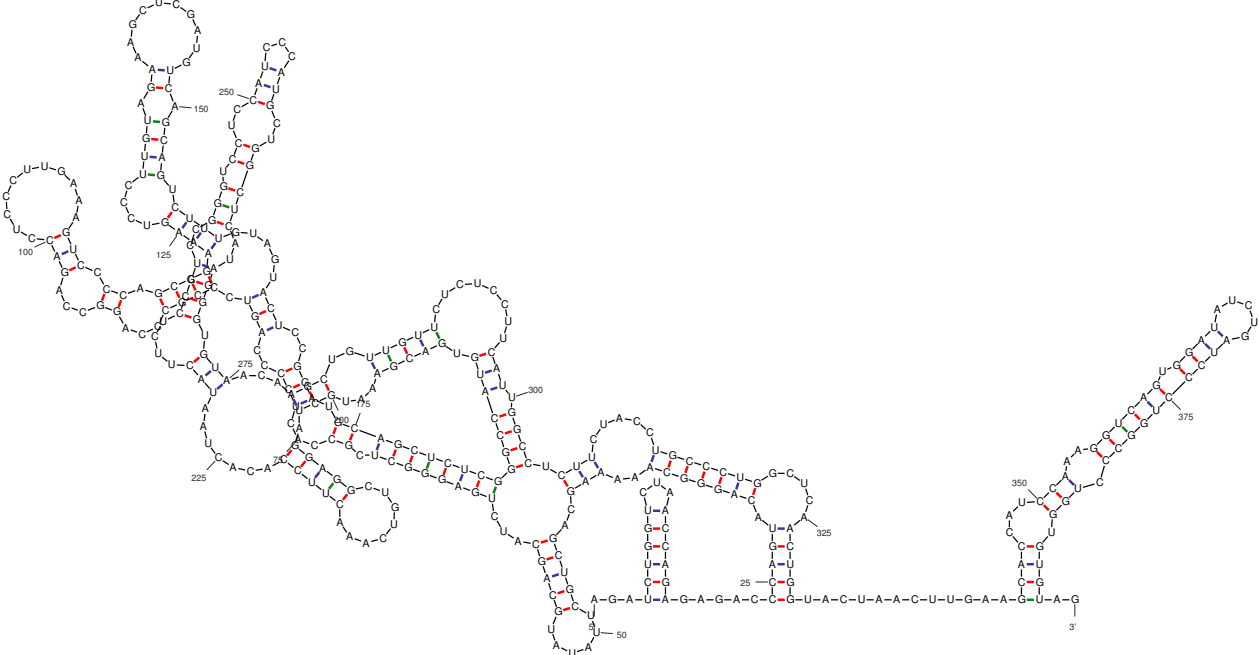

dG = -95.1 HAamiRNA

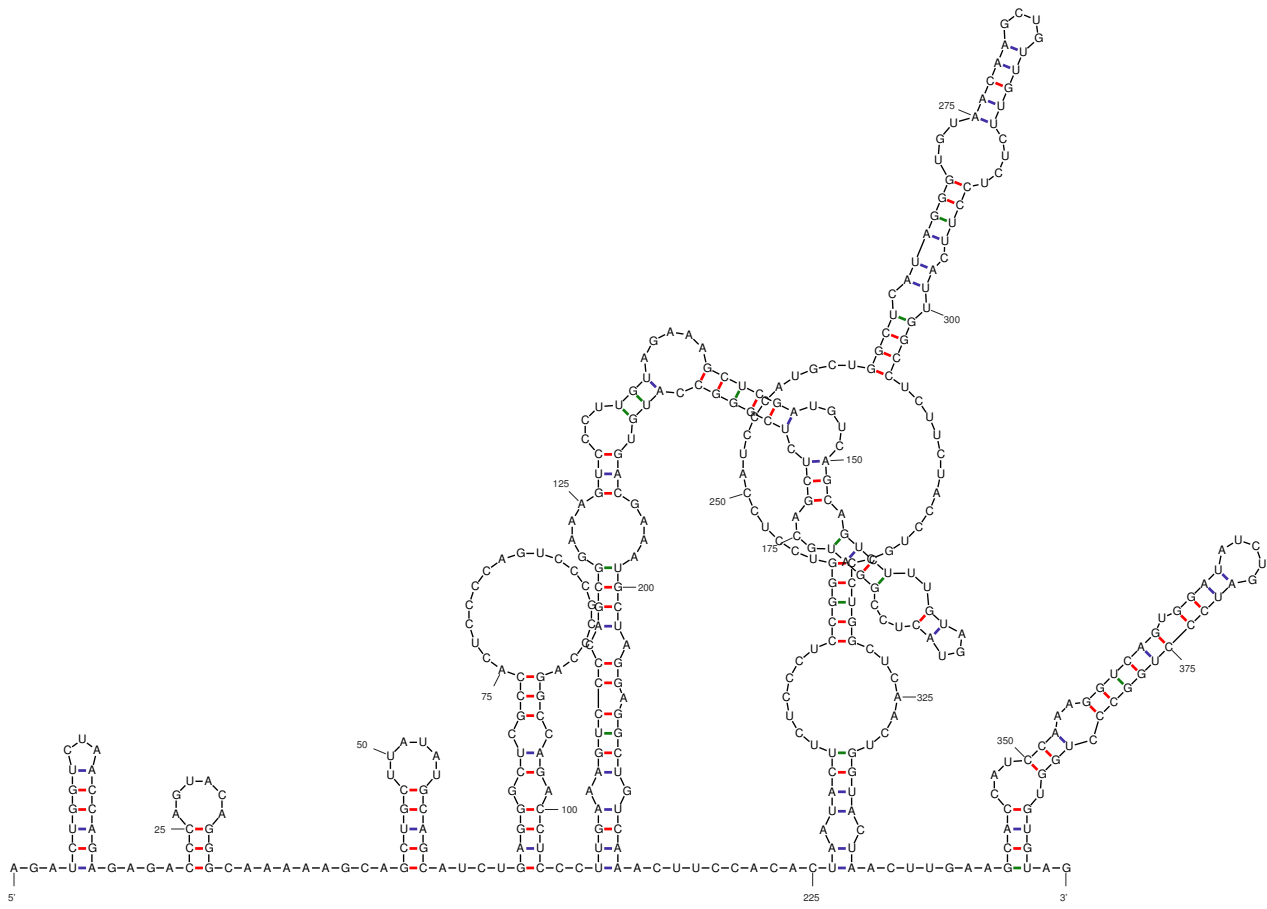

dG = -95 HAamiRNA

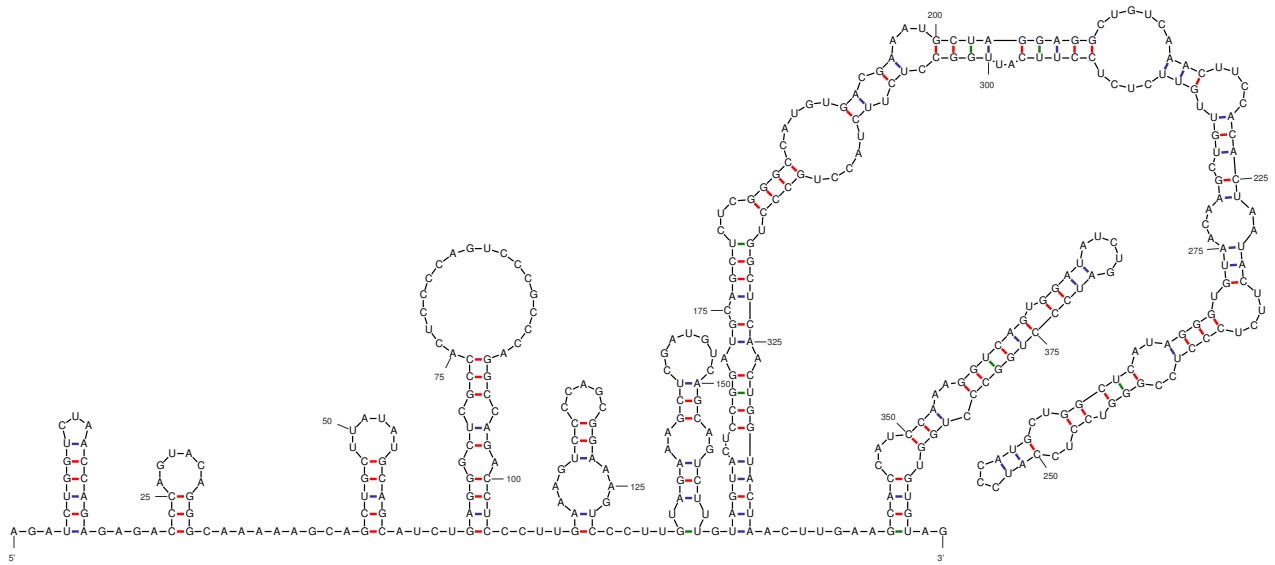

dG = -94.9 HAamiRNA
