# Supplementary material for: RNA silencing and HIV: A hypothesis for the etiology of the severe combined immunodeficiency induced by the virus
Source: Springer Nature journal article supplement (doi:10.1186/1742-4690-5-79), 2008-01-01
Supplement: Additional file 2 [file 1742-4690-5-79-s2.pdf]

# PREDICTED HAA miRNA 1

LBLudwig

PREDICTED Bennasser Y., et al #4 microRNA precursor (sense)\*

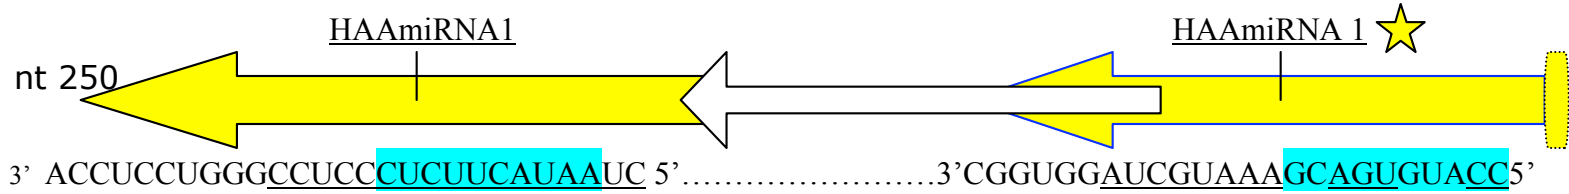

B.TGGGATGGATGACCCGGAGAGAGAAGTGTAGAGTGGAGGTTTGACAGCCGCCTAGCATTTCATCACGTGGCC<sup>9381</sup>

|            |      |        |       |      |      |      |     |        |           |            |       |
|------------|------|--------|-------|------|------|------|-----|--------|-----------|------------|-------|
| AU455      | AG A | TGAA   | A     | AT   | A    | TAC  | G   | AA A   | AGA       | T          |       |
| C2220      | A    | G TGAA | C     | A A  | A    | T A  |     | CGCAGA | A         |            |       |
| D84ZRO85   | G    | GA     | AG    | T    | A A  | A A  |     | G G    | AA        |            |       |
| F1VI850    | G    | TGAA   | C     | GAG  | A    | A    | G   | C GAGA | A A       |            |       |
| GSE6165    | G    | GAA    | C     | G T  | A    | TA   |     | CGGAGA | A A       |            |       |
| H90CF056   | G    | TGAC   | G     | GAT  | AA   | T A  |     | GACA   | T         |            |       |
| JSE7887    | G    | TGAA   | A     | C    | A    | TC   |     | CGGAGA | A A       |            |       |
| KMP535     | G    | TGAAC  | C     | A AT | A    | TTC  |     | CGAAGA | A         |            |       |
| 01         | A A  | G      | GAA   | A C  | GAT  | A    |     | TGC    | CGAA      | A A        |       |
| 02         | A    | G      | GAC   | T C  | GATC | A    |     | TA A   | G CAGA    | ACA T      |       |
| 03         | A    |        | TGA   | A A  | AT   | A    |     | T G    | TC AACA   | AGA        |       |
| 04         | A    | G      | TGAA  |      | A    | A    |     | T G    | ACA G     | A          |       |
| N.YBF30    | AGCA |        | TGATC | T A  | G T  | C A  |     | TC     | AGAAGA    | T A A      |       |
| O.MVP5180  | GCT  | G      | TG AC | CG G | A A  | CA   | T   | ATCAT  | GC AACA   | T A A      |       |
| O.ANT70    | AT T | A      | TA AC | T A  | A AC | GAT  | A   | T ATCT | GCAACACC  | T T T      |       |
| CPZ.CPZUS  | A    |        | TGAAC | TG C | C    | ATC  | CA  | CTGAA  | G TCGGAGA | AGA T      |       |
| CPZ.CPZGAB | A    |        | TGA   | C A  | G C  | G TC | C C | A G    | G C AAGA  | TA T       |       |
| CPZ.CAM3   | A    |        | TG AC | TG   | C    | G TC | A   | A G    | G C AAGA  | A A        |       |
| CPZ.CAM5   | G    |        | TGAAC | TG   | C    | TC   | A   | A G    | G TC GA   | A C A      |       |
| CPZ.CPZANT | T GA |        | AC T  | A    | GA   | C    | AGA | GAA    | TGCAA     | GATGAGAAGA | A T A |

# PREDICTED HAamiRNA2

Ibludwig

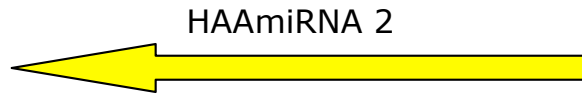

3'GGUACUUCCUCUCUUGUUGUCG AACAAUGU5'271 HIVaINR antisense RNA

B.HXB2 CAATAAAGGAGAGAACACCAGC...TTGTTACACCCTGTGAGCCTGCAT9310

|                |               |             |          |  |         |               |
|----------------|---------------|-------------|----------|--|---------|---------------|
| AU455          | T C GG        |             | A T C AC |  | A AT    | AA(224 5'LTR) |
| C2220          | G             |             | A T C G  |  | C       |               |
| D84ZRO85       | C G           | AG          | A T C    |  | A CT    | A             |
| F1VI850        | G             |             | A T      |  | CA      | AA            |
| GSE6165        |               |             | A T C A  |  | CA CT   | A             |
| H90CF056       | G             |             | A C      |  | CA      |               |
| JSE7887        | T G           | A           | A T C    |  | CA AT   | A             |
| KMP535         | CAG           | G           | A T C    |  | CA A A  | A             |
| 01             | C             | A           | A T C    |  | CA      | A             |
| 02             | G             |             | A T A    |  | CA CT T | AA            |
| 03             | CAG G         |             | A C A    |  | A AT    | AA            |
| 04             | C G           |             | T T C G  |  | A A     | A             |
| N.YBF30        | T G           | C           | ATGC C C |  | CA AT T | AA            |
| O.MVP          | GGG TAC A TG  | AGATGCTAGTC | TC       |  | T A CTT | TAAT          |
| O.ANT70        | AGGA TAC TGTG | G GGGCTAATC | CC G     |  | T A CAT | TGCC          |
| CPZ.CPZUS      |               | C A TA      | C C G    |  | CA T    | A             |
| CPZ.CPZGAB     | G             | T A T       | C G      |  | T CA AT | T A           |
| CPZ.CAM3       | G             | T T A T     | C ACG    |  | CA CT   | A             |
| CPZ.CAM5       | CG            | C C AT TA   | C C T    |  | CA AT   | AA            |
| CPZ.CPZANTXXXX | AT            | GG A TA     | C CC C   |  | CTT     | TAC           |
